# Supplementary material for: Characterization of high Zr/Ce ratio Ba(Zr,Ce,Y)O 3− δ proton conductors: investigating the impact of Y on the properties of materials
Source: Royal Society of Chemistry journal article supplement (doi:10.1039/d4cp04384g), 2024-12-03
Supplement: d4cp04384g1.pdf [file d4cp04384g1.pdf]

## Supplementary Information

### **Characterization of high Zr/Ce ratio Ba(Zr, Ce, Y)O<sub>3-δ</sub> proton conductors: investigating the impact of Y on materials properties**

Yuan Zeng<sup>1,2\*</sup>, Moritz Kindelmann<sup>1,3</sup>, Kwati Leonard<sup>4</sup>, Laura-Alena Schäfer<sup>1,2</sup>, Kai Yao<sup>1</sup>, Jürgen Malzbender<sup>5</sup>, Michael Müller<sup>5</sup>, Olivier Guillon<sup>1,2,6</sup>, Mariya E. Ivanova<sup>1</sup>, Norbert H. Menzler<sup>1,2</sup>

*1 Forschungszentrum Jülich GmbH, Institute of Energy Materials and Devices IMD-2: Materials Synthesis and Processing, 52425 Jülich, Germany*

*2 Department of Ceramics and Refractory Materials, Institute of Mineral Engineering, RWTH Aachen University, 52064 Aachen, Germany*

*3 Forschungszentrum Jülich GmbH, Ernst Ruska-Centre for Microscopy and Spectroscopy with Electrons (ER-C), 52425 Jülich, Germany*

*4 International Institute for Carbon Neutral Energy Research (WPI-I2CNER), Kyushu University 744 Motoooka, Nishiku, Fukuoka 819-0395, Japan*

*5 Forschungszentrum Jülich GmbH, Institute of Energy Materials and Devices IMD-2: Microstructure and Properties of Materials, 52425 Jülich, Germany*

*6 Jülich-Aachen Research Alliance: JARA-Energy, 52425 Jülich, Germany*

*Corresponding author's email: [y.zeng@fz-juelich.de](mailto:y.zeng@fz-juelich.de);*

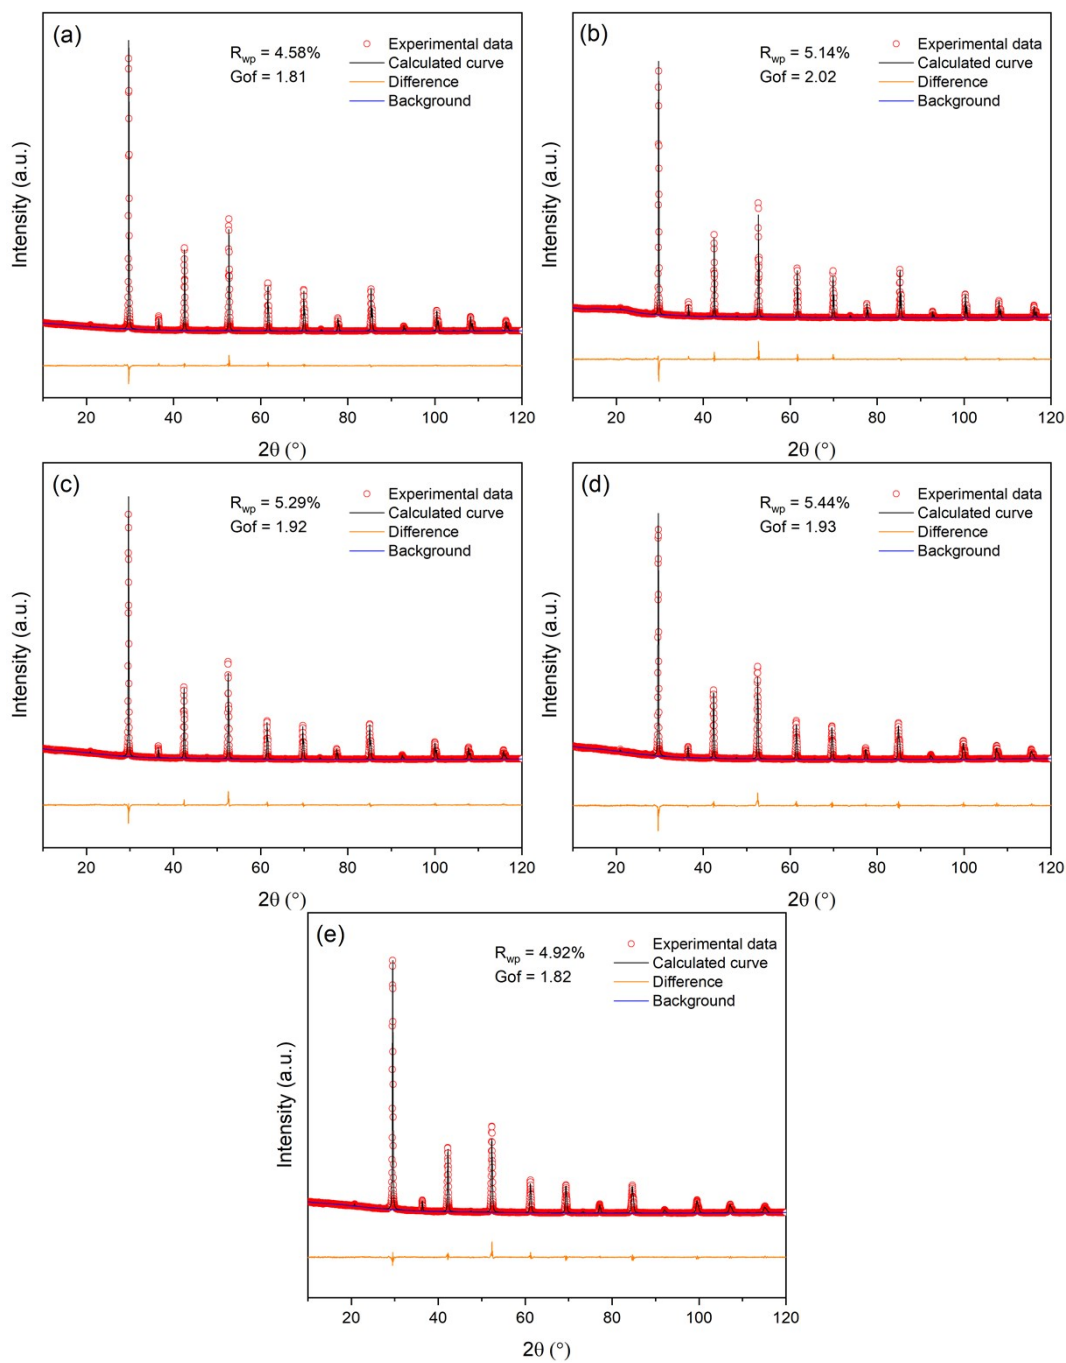

Figure S1. XRD patterns of the BaZr<sub>0.8-x</sub>Ce<sub>0.2</sub>Y<sub>x</sub>O<sub>3-δ</sub> ceramics with refined data based on Rietveld method. (a) BZCY – Y10, (b) BZCY – Y15, (c) BZCY – Y20, (d) BZCY – Y25, (e) BZCY – Y30.

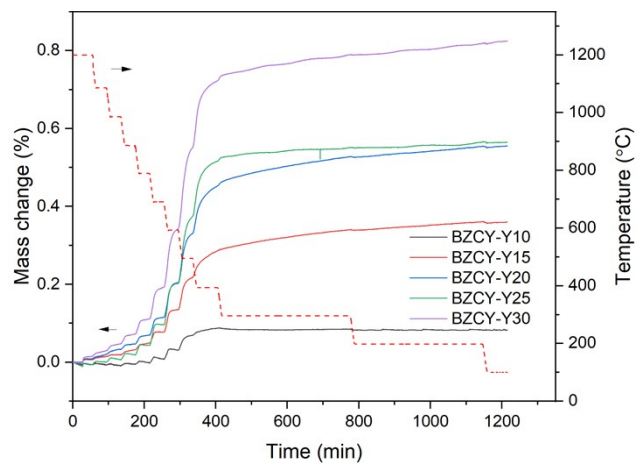

Figure S2 Mass change recorded versus time and temperature for materials in the  $\text{BaZr}_{0.8-x}\text{Ce}_{0.2}\text{Y}_x\text{O}_{3-\delta}$  series.

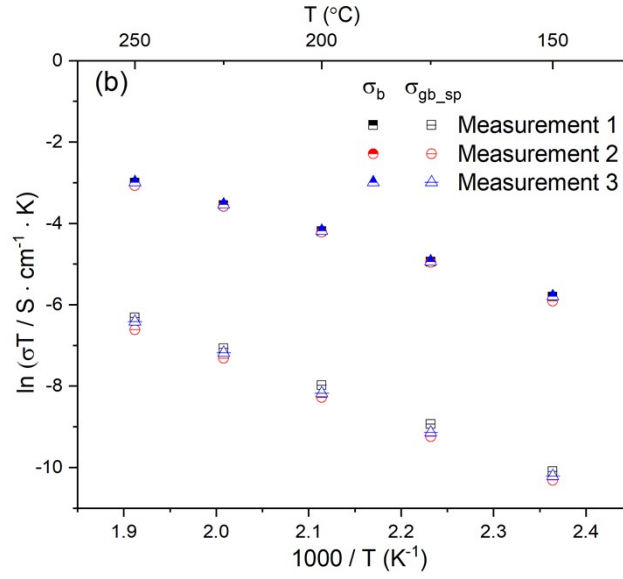

Figure S3. (a) Arrhenius plots of bulk and specific grain boundary conductivities of three different BZCY-Y10 samples in the temperature range 150-250 °C.

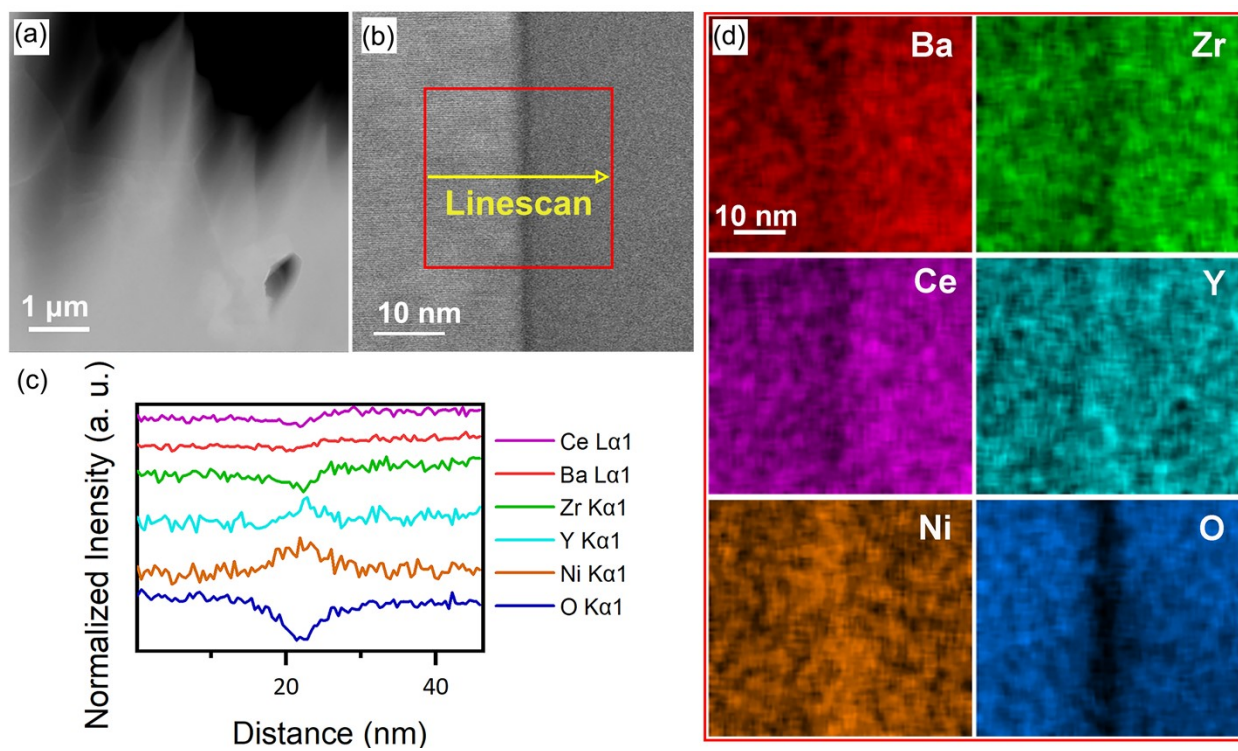

Figure S4. (a, b) High-angle annular dark-field images (HAADF) of the BZCY-Y30 microstructure and an edge-on grain boundary (the electron beam is parallel to the grain boundary). (c) Integrated linescan derived from the EDS element mapping in (d).

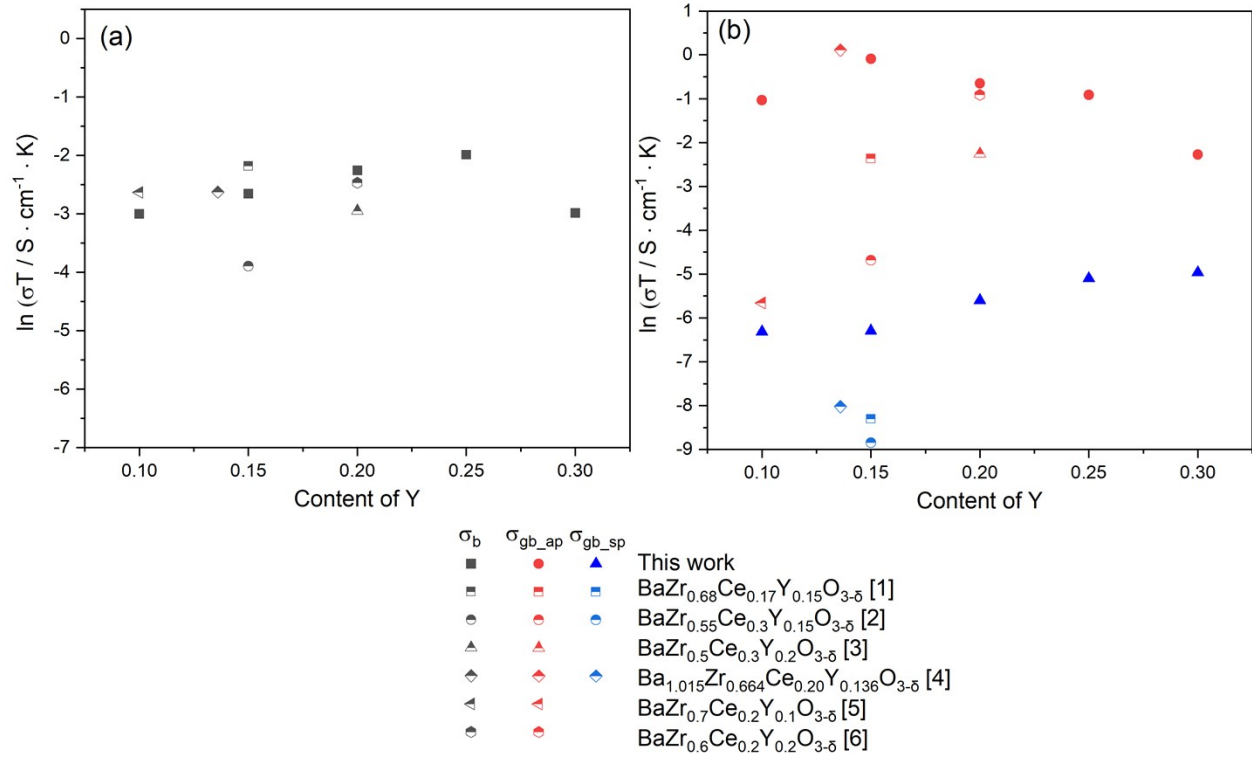

Figure S5. (a) Bulk, (b) apparent and specific grain boundary conductivities as a function of Y content at 250 °C, including a comparison of the results from this work with those from the literature.

#### Reference

- [1] H.-W. Kim, J. Seo, J. H. Yu, K. S. Yun, J. H. Joo, J. Moon and H. J. Park, *Ceramics International*, 2021, **47**, 32720–32726.
- [2] N. Nasania, Z. Shakelb, F.J.A. Loureiro, B. Panigrahi, B. B. Kale and D. P. Fagg, *Journal of Alloys and Compounds*, 2021, **762**, 158640
- [3] R. Guo, L. Yang, Y. Wang, Y. Xiao, R. Guan, M. Wang and T. He, *Ceramics International*, 2022, **48**, 11793–11804.
- [4] Y. Huang, R. Merkle, D. Zhou, W. Sigle, P. A. Van Aken and J. Maier, *Solid State Ionics*, 2023, **390**, 116113.
- [5] S. Ricote and N. Bonanos, *Solid State Ionics*, 2010, **181**, 694–700.
- [6] D. Han, K. Goto, M. Majima and T. Uda, *ChemSusChem*, 2021, **14**, 614-623.

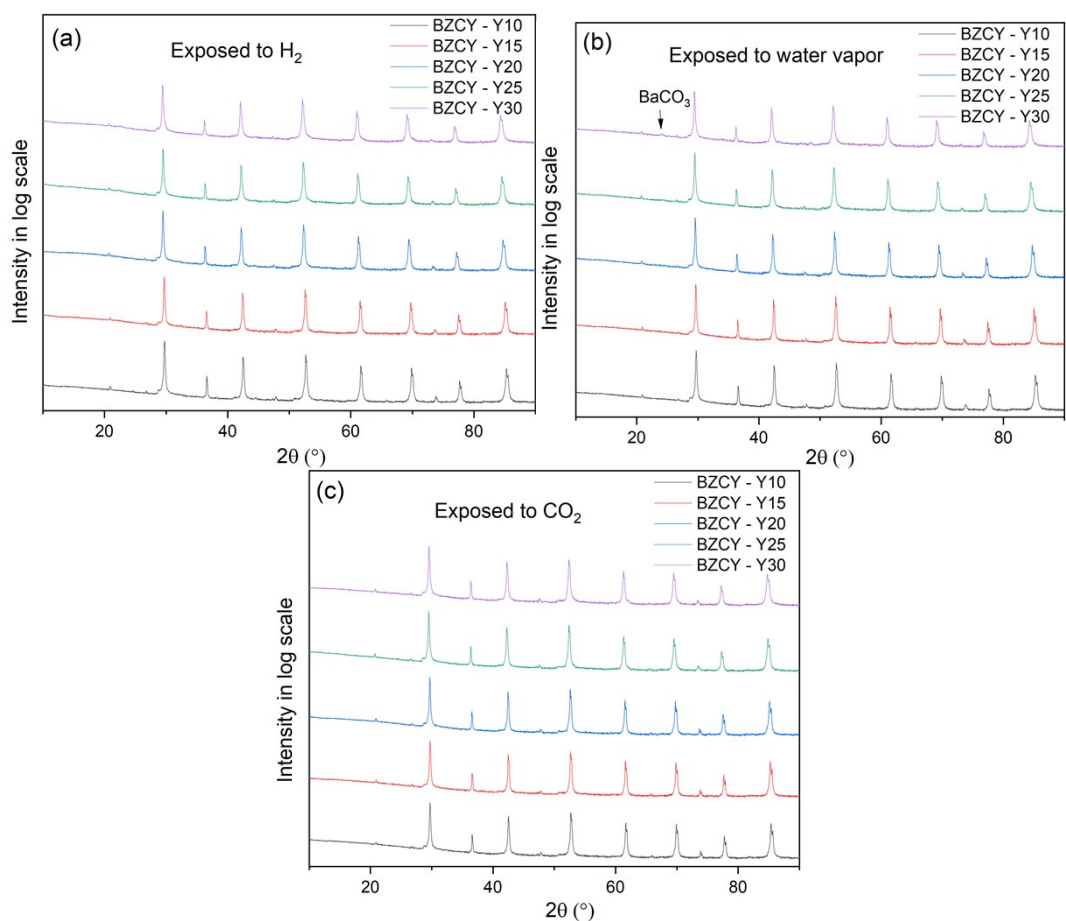

Figure S6. XRD patterns of materials from  $\text{BaZr}_{0.8-x}\text{Ce}_{0.2}\text{Y}_x\text{O}_{3-\delta}$  series after exposure to (a) Ar / 4 vol.%  $\text{H}_2$ , Ar / 50 vol.%  $\text{H}_2\text{O}$  and Ar / 50 vol.%  $\text{CO}_2$  at 700 °C. Peak intensity is amplified by log scale.
